# Supplementary material
Source: Elsevier journal article supplement (https://orbilu.uni.lu/bitstream/10993/26526/4/mmc3.xls)
Supplement: mmc3 [file mmc3.xls]

## Sheet: Sheet1
SIM Method
Metabolite Name	No. Carbon Atoms (metabolite backbone)	MID Size	m/z range (selected fragment ion)	Dwell Time (ms)	sum formula (fragment ion)
Pyruvate_174	3	4	174.0 … 180.0	15	C6H12O3NSi
Lactate_261	3	4	261.1 … 267.1	15	C11H25O3Si2
Alanine_260	3	4	260.1 … 266.1	15	C11H26NO2Si2
Glycine_246	2	3	246.1 … 252.1	15	C10H24NO2Si2
GABA_274	4	5	274.2 … 281.2	15	C12H28NO2Si2
Succinate_289	4	5	289.1 … 296.1	15	C12H25O4Si2
Fumarate_287	4	5	287.1 … 294.1	15	C12H23O4Si2
Itaconate_301	5	6	301.1 … 309.1	10	C13H25O4Si2
Serine_390	3	4	390.2 … 396.2	15	C17H40NO3Si3
Methionine_320	5	6	320.2 … 328.2	10	C13H30NO2SSi2
aKetoglutarate_346	5	6	346.2 … 354.2	10	C14H28NO5Si2
Malate_419	4	5	419.2 … 426.2	15	C18H39O5Si3
Aspartate_418	4	5	418.2 … 425.2	15	C18H40NO4Si3
Glutamate_432	5	6	432.3 … 440.3	10	C19H42NO4Si3
Glutamine_431	5	6	431.3 … 439.3	10	C19H43N2O3Si3
Citrate_591	6	7	591.3 … 600.3	10	C26H55O7Si4
